# Supplementary material for: Formation and fluctuation of two-dimensional dodecagonal quasicrystals
Source: Royal Society of Chemistry journal article supplement (doi:10.1039/d2sm00798c), 2022-01-01
Supplement: d2sm00798c6.pdf [file d2sm00798c6.pdf]

# Formation and Fluctuation of Two-dimensional Dodecagonal Quasicrystal

## SUPPLEMENTARY INFORMATION

Uyen Tu Lieu<sup>\*a</sup> and Natsuhiko Yoshinaga<sup>a,b</sup>

August 24, 2022

<sup>a</sup> *Mathematics for Advanced Materials-OIL, AIST, 2-1-1 Katahira, Aoba, 980-8577 Sendai, Japan*

<sup>b</sup> *WPI-Advanced Institute for Materials Research (WPI-AIMR), Tohoku University, 2-1-1 Katahira, Aoba, 980-8577 Sendai, Japan*

*E-mail: uyen.lieu@aist.go.jp; yoshinaga@tohoku.ac.jp*

### **1 Supporting video**

Network rearrangement corresponding to Fig.11 in the main text from the time step  $3000 \times 10^4$  to  $3800 \times 10^4$ .

### **2 Results for isotropic particle system**

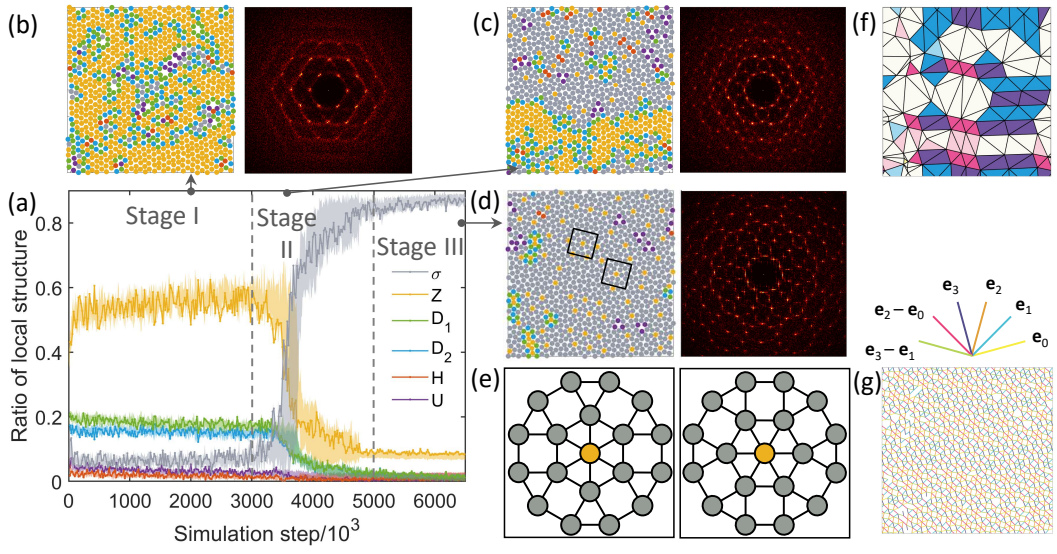

Figure S1: Change in local structures of isotropic particles during annealing simulations at  $\rho_a = 0.825$ . (a) Ratio of the local structure in time; the line represents the data of a simulation, the shade area corresponds to the 95% confidence intervals of 10 independent simulations. The growth of the DDQC is divided into three stages. (b-d) The snapshots and their Fourier transformations. (e) Two kinds of dodecagonal motif as shown in the boxes in (d), they are interchangeable by rotating the particles on the first ring  $\pm 30^\circ$ . (f) The packing of the dodecagonal motifs of the structure in (d). (g) Orientations of the tiling edges connected by the particle positions of the structure in (d); the colours of the edges correspond to the six unit vectors shown above.

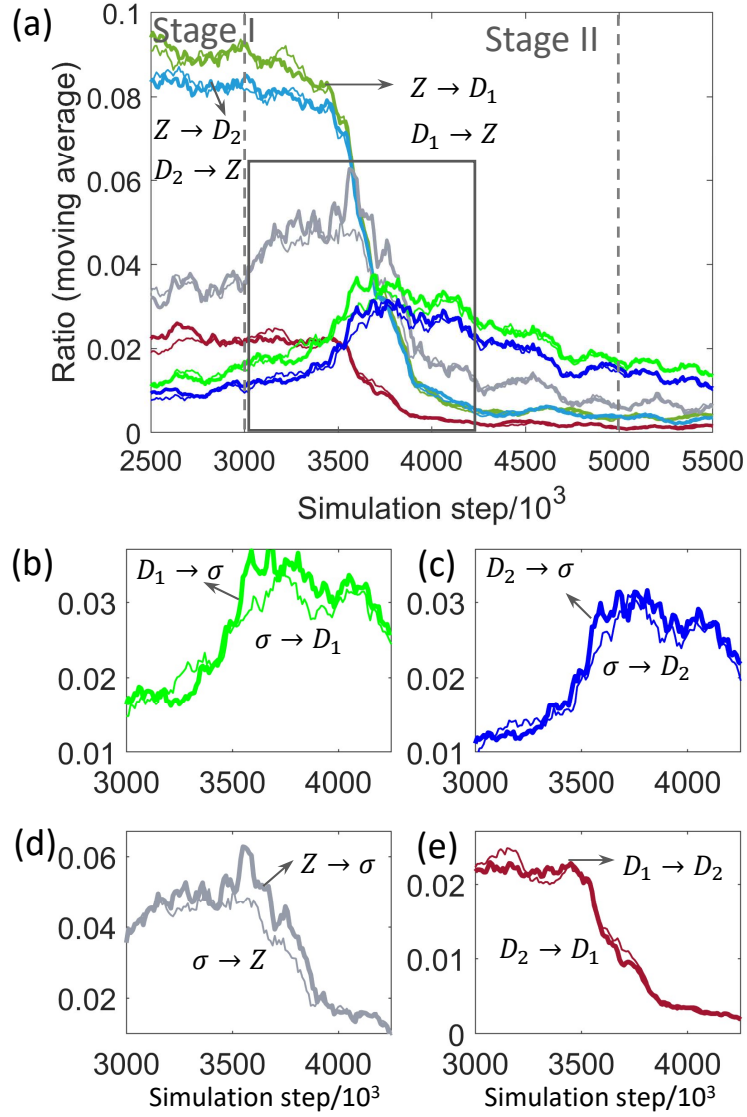

Figure S2: Interchanges between the local structures during the growth made of isotropic particles at  $\rho_a = 0.825$  by decomposition of the “in” and “out” amount of selected pairs of local structures (a). (b-e) The corresponding data inside the box in (a). The graph show moving average of 15 data points.

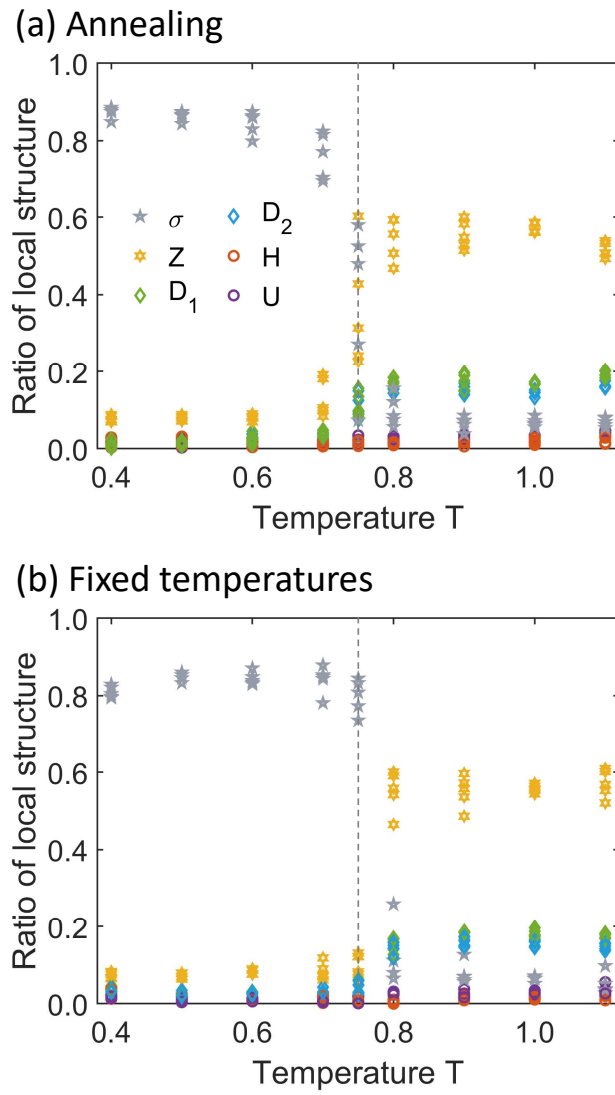

Figure S3: Dependence of ratio of local structure of isotropic particles on temperature in (a) annealing simulations, (b) fixed temperature simulations at  $\rho_a = 0.825$ . The dashed lines estimate the critical temperature  $T^*$ .

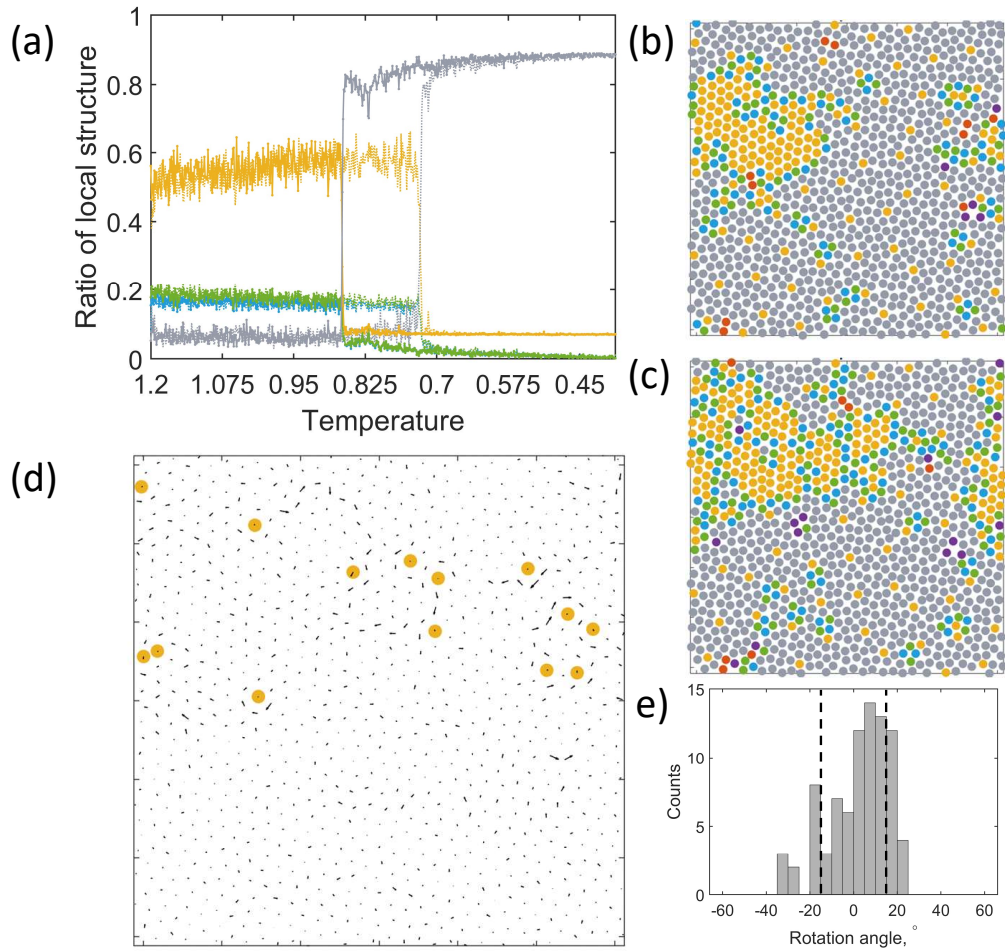

Figure S4: The reverse transition from DDQC to the  $Z$  structure for isotropic particles. (a) Structural change of particle composition during the reverse (continuous line) and annealing (dotted line). (b-c) Snapshots showing the expansion of  $Z$  particles region during the reverse process taken at  $T = 0.8625$ . (d) Displacements of particles from snapshot (b) to (c). Some rotations of the first neighbours of  $Z$  particles (marked yellow) can be observed. (e) Histogram of the rotation angle of the neighbours of  $Z$  particles in (d); dashed lines indicate peaks at  $\pm 15^\circ$ .
