# Supplementary figures and images for: Formation and fluctuation of two-dimensional dodecagonal quasicrystals
Source: Royal Society of Chemistry journal article supplement (doi:10.1039/d2sm00798c), 2022-01-01

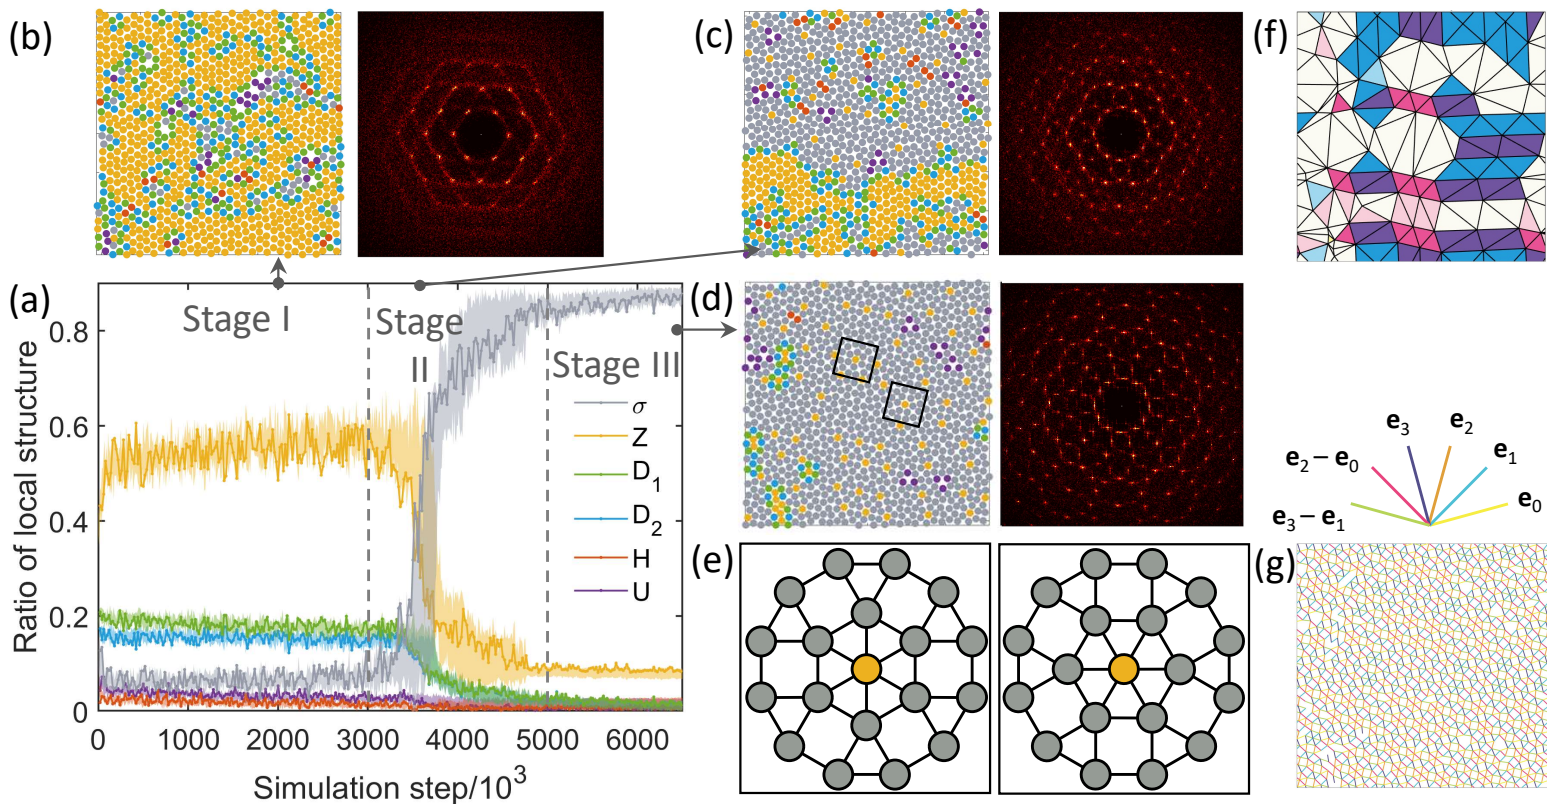

Supplement: d2sm00798c2.pdf [file d2sm00798c2.pdf]

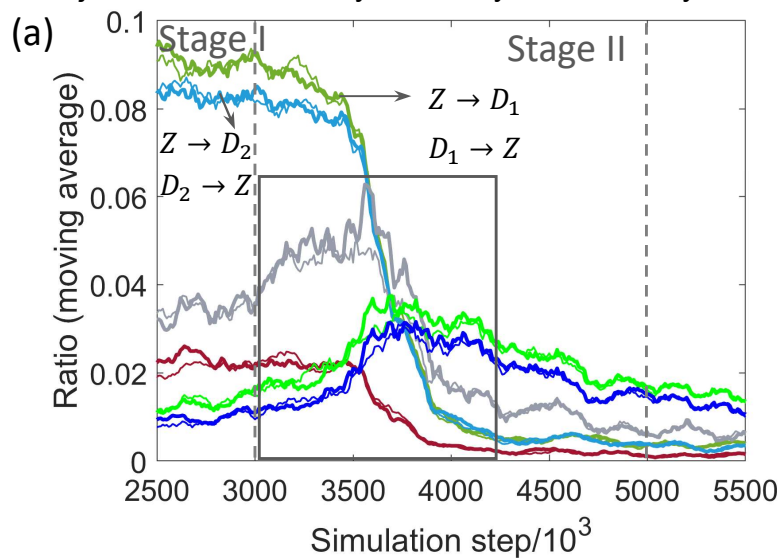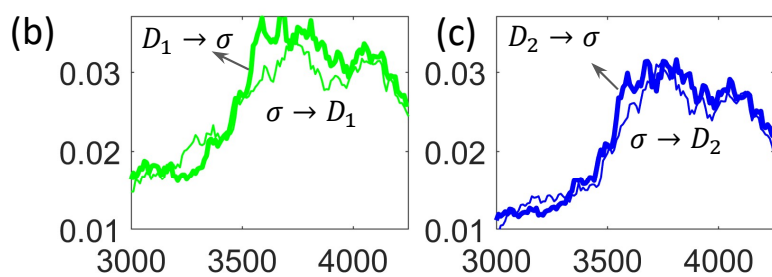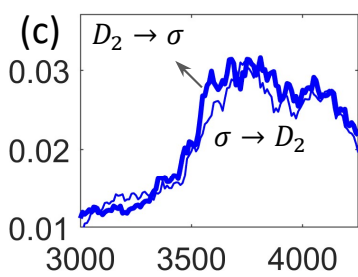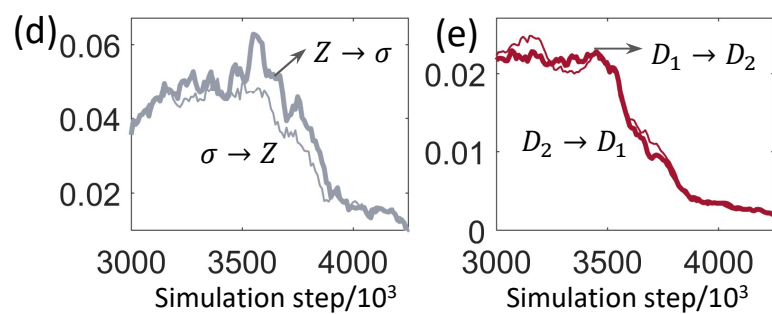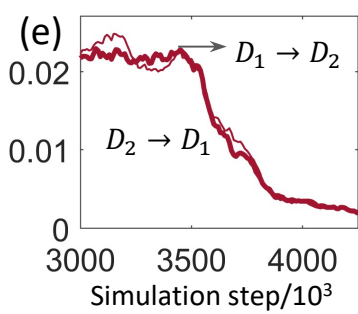

Supplement: d2sm00798c3.pdf [file d2sm00798c3.pdf]

### (a) Annealing

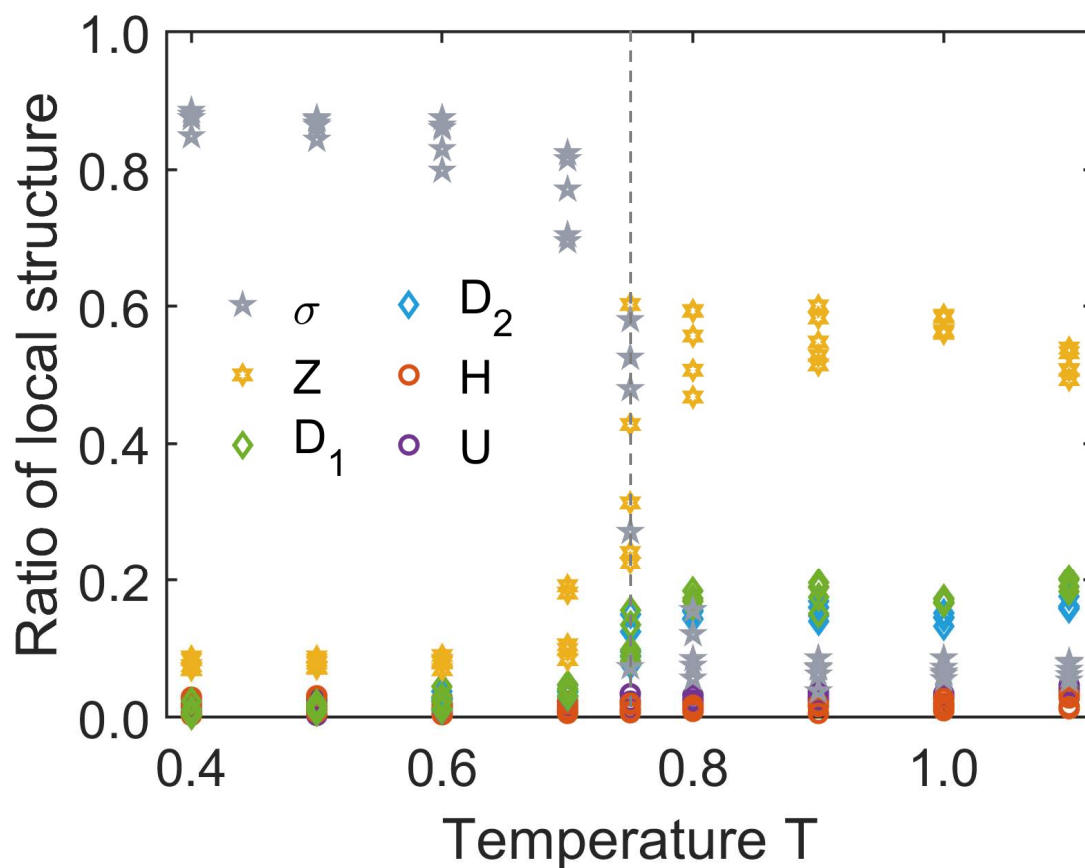

### (b) Fixed temperatures

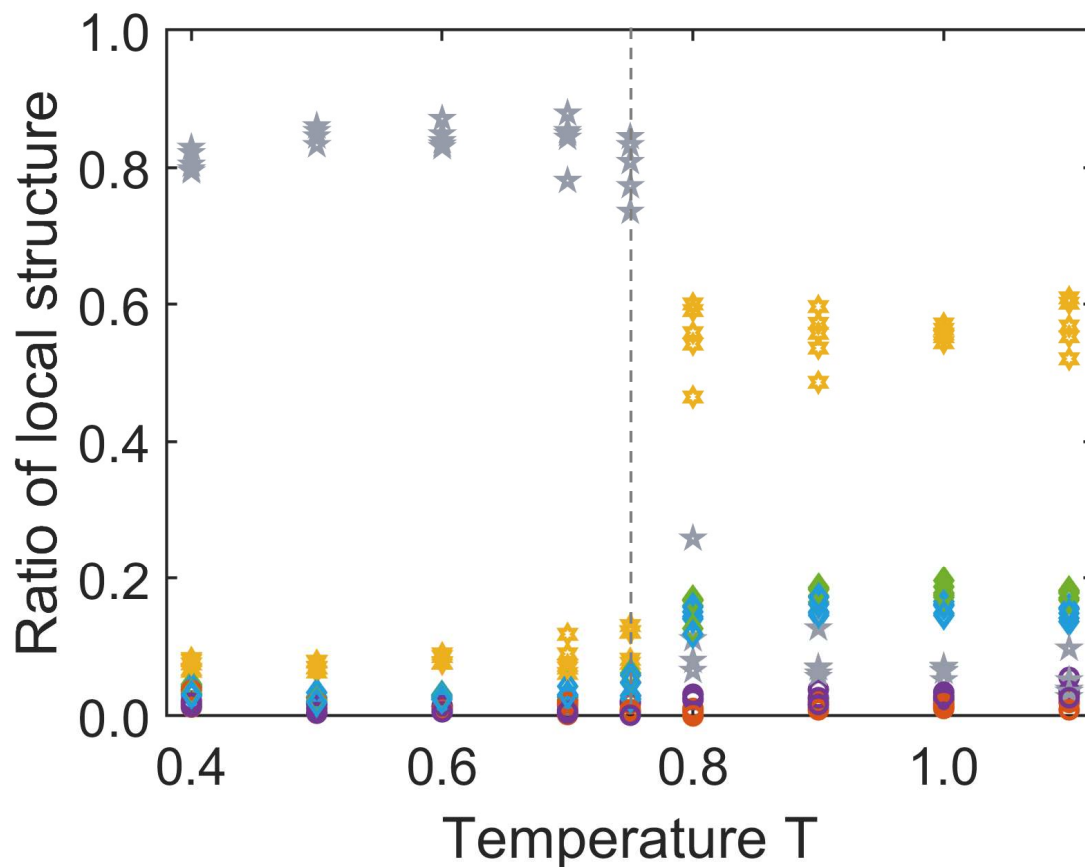

Supplement: d2sm00798c4.pdf [file d2sm00798c4.pdf]

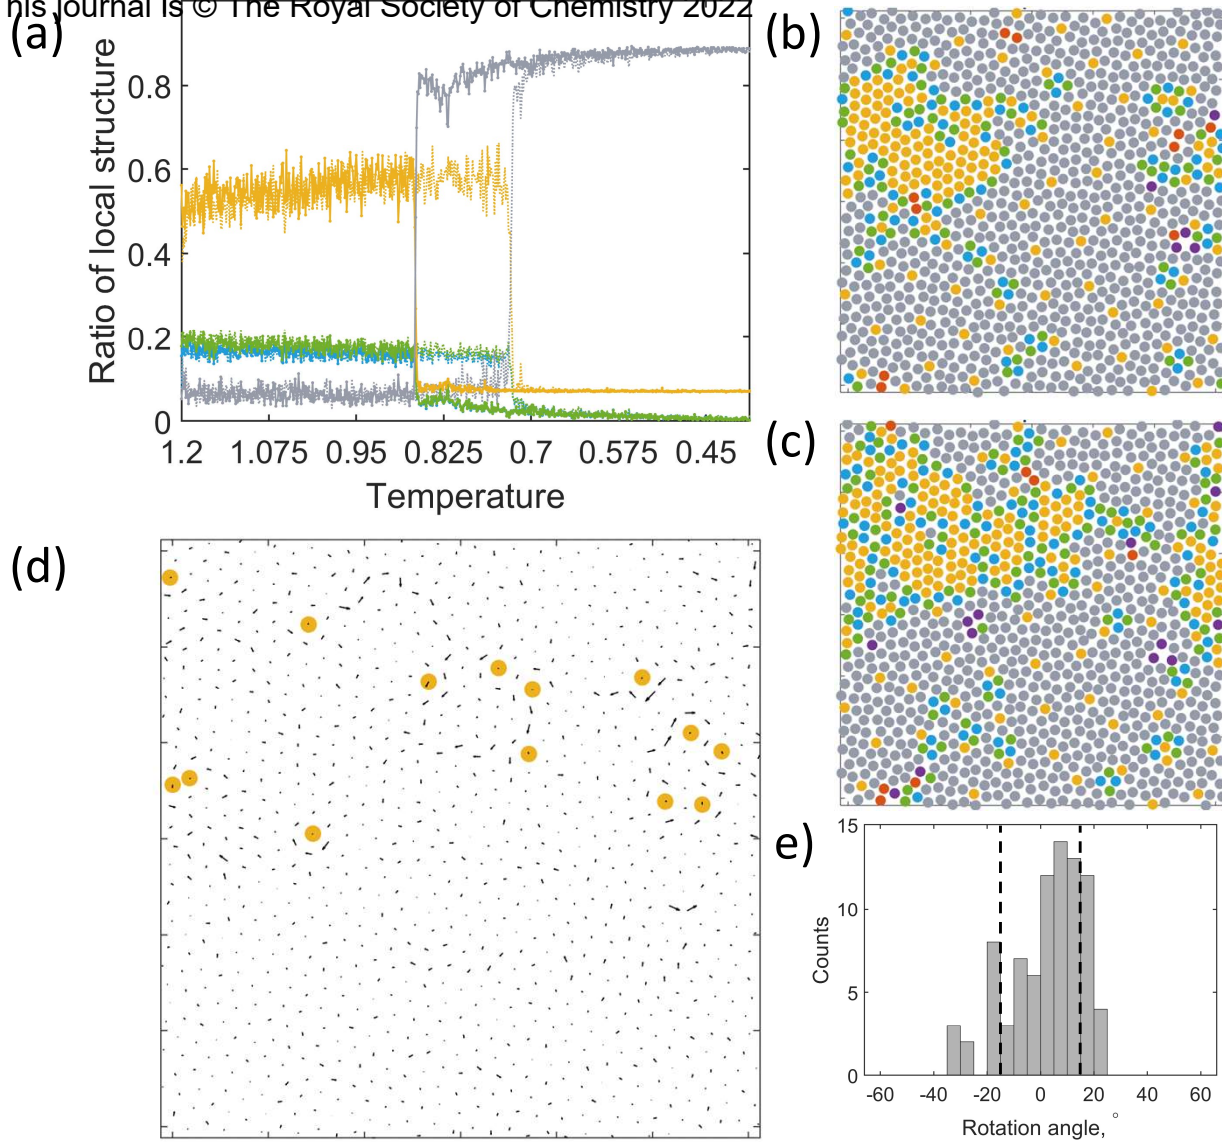

Supplement: d2sm00798c5.pdf [file d2sm00798c5.pdf]
